# Supplementary material for: Synthesis of rhodium(i) and rhodium(iii) perfluoroalkyl complexes from [Rh(μ-OH)(COD)]2
Source: Royal Society of Chemistry journal article supplement (doi:10.1039/b822738a), 2009-01-01
Supplement: b822738a.pdf [file b822738a.pdf]

## **ELECTRONIC SUPPLEMENTARY INFORMATION**

### **Synthesis of Rhodium(I) and Rhodium(III) Perfluoroalkyl Complexes from $[\text{Rh}(\mu\text{-OH})(\text{COD})]_2$**

**José Vicente,<sup>\*a</sup> Juan Gil-Rubio,<sup>\*a</sup> Juan Guerrero-Leal<sup>a</sup> and Delia Bautista<sup>b</sup>**

<sup>a</sup> Grupo de Química Organometálica, Departamento de Química Inorgánica, Facultad de Química, Universidad de Murcia, Apartado de correos 4021, E-30071 Murcia, Spain

<sup>b</sup> SACE, Universidad de Murcia, Apartado de correos 4021, E-30071 Murcia, Spain

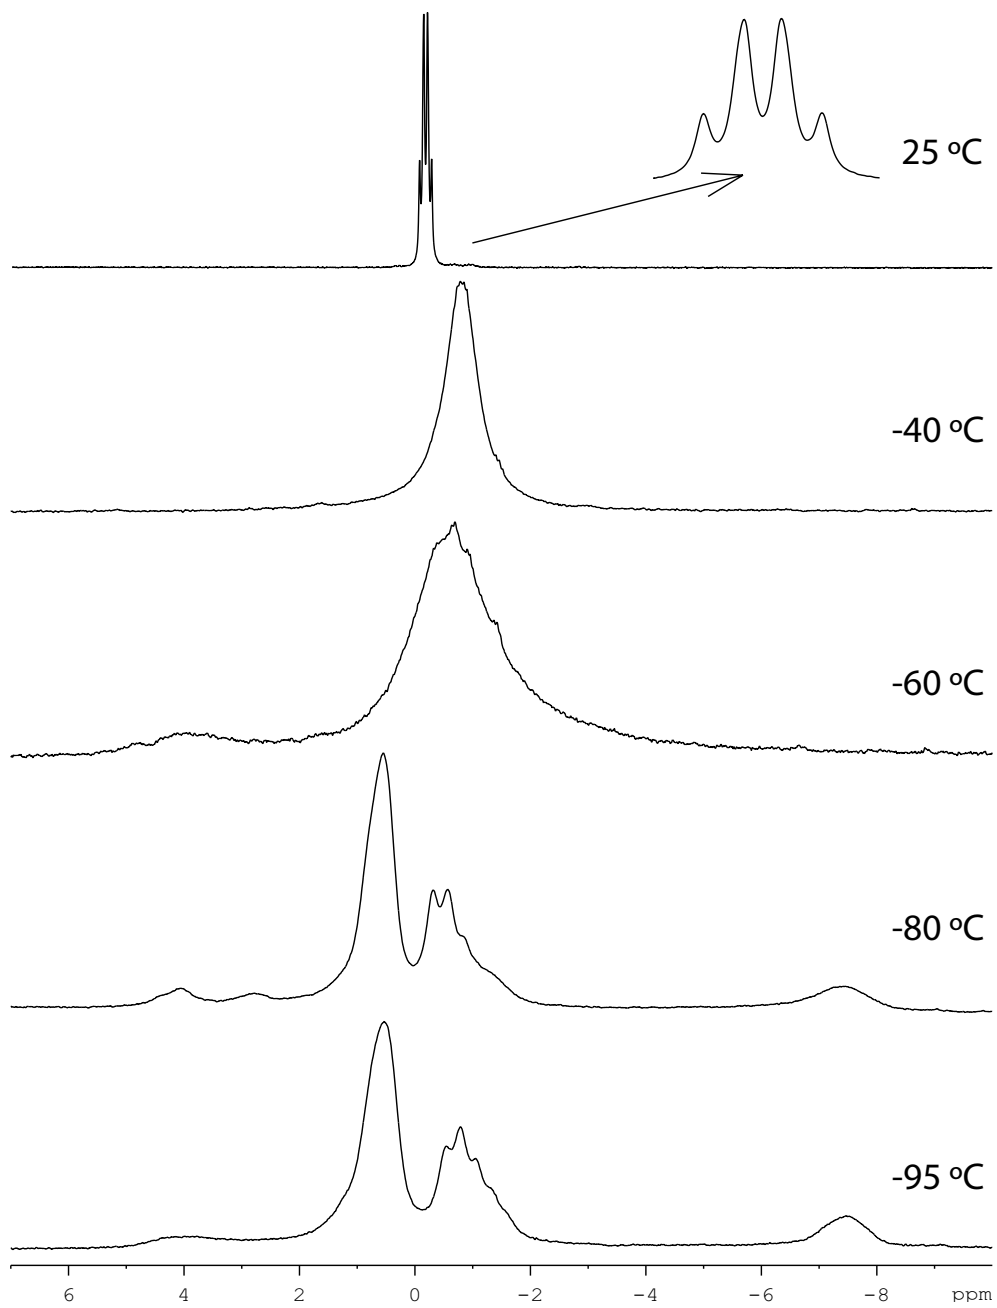

Variable temperature  $^{19}\text{F}$  NMR spectrum ( $\text{CD}_2\text{Cl}_2$ , 282.2 MHz) of compound **15**.

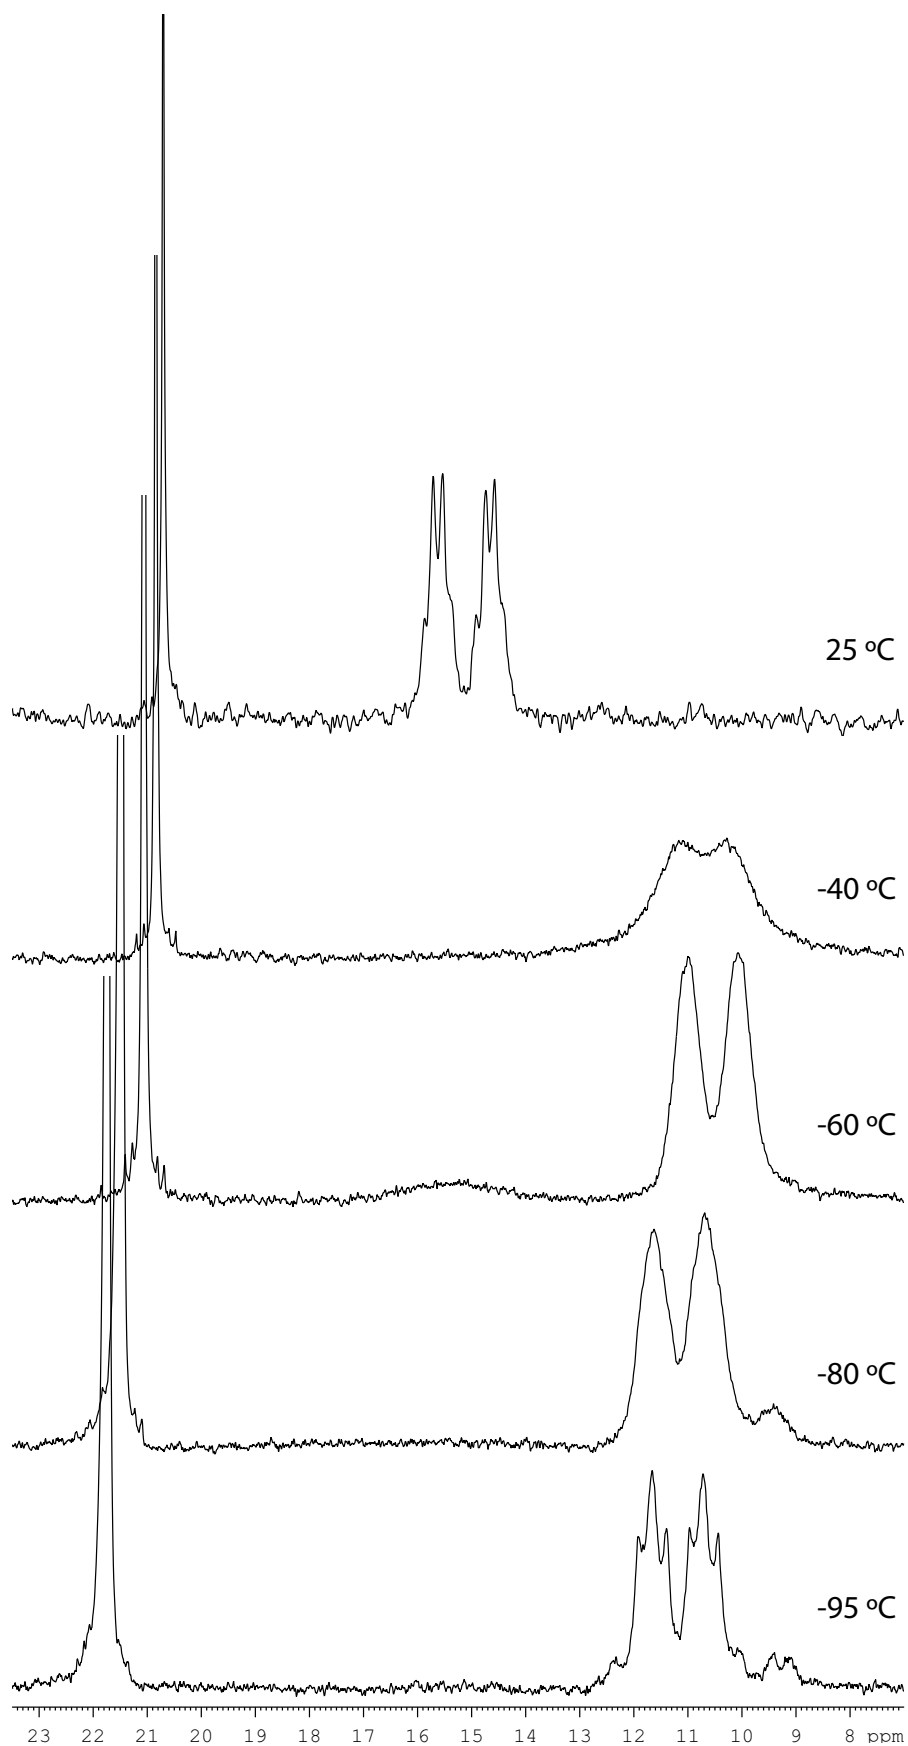

Variable temperature  $^{31}\text{P}\{^1\text{H}\}$  NMR spectrum ( $\text{CD}_2\text{Cl}_2$ , 121.5 MHz) of compound **15**. The singlet at 21-22 ppm corresponds to the  $\text{PMe}_2\text{Ph}_2^+$  cation.
